# Supplementary material for: Complete chloroplast genome of the medicinal plant Amomum compactum: gene organization, comparative analysis, and phylogenetic relationships within Zingiberales
Source: PubMed Central journal article supplement (PMC5811967; doi:10.1186/s13020-018-0164-2), 2018-02-13

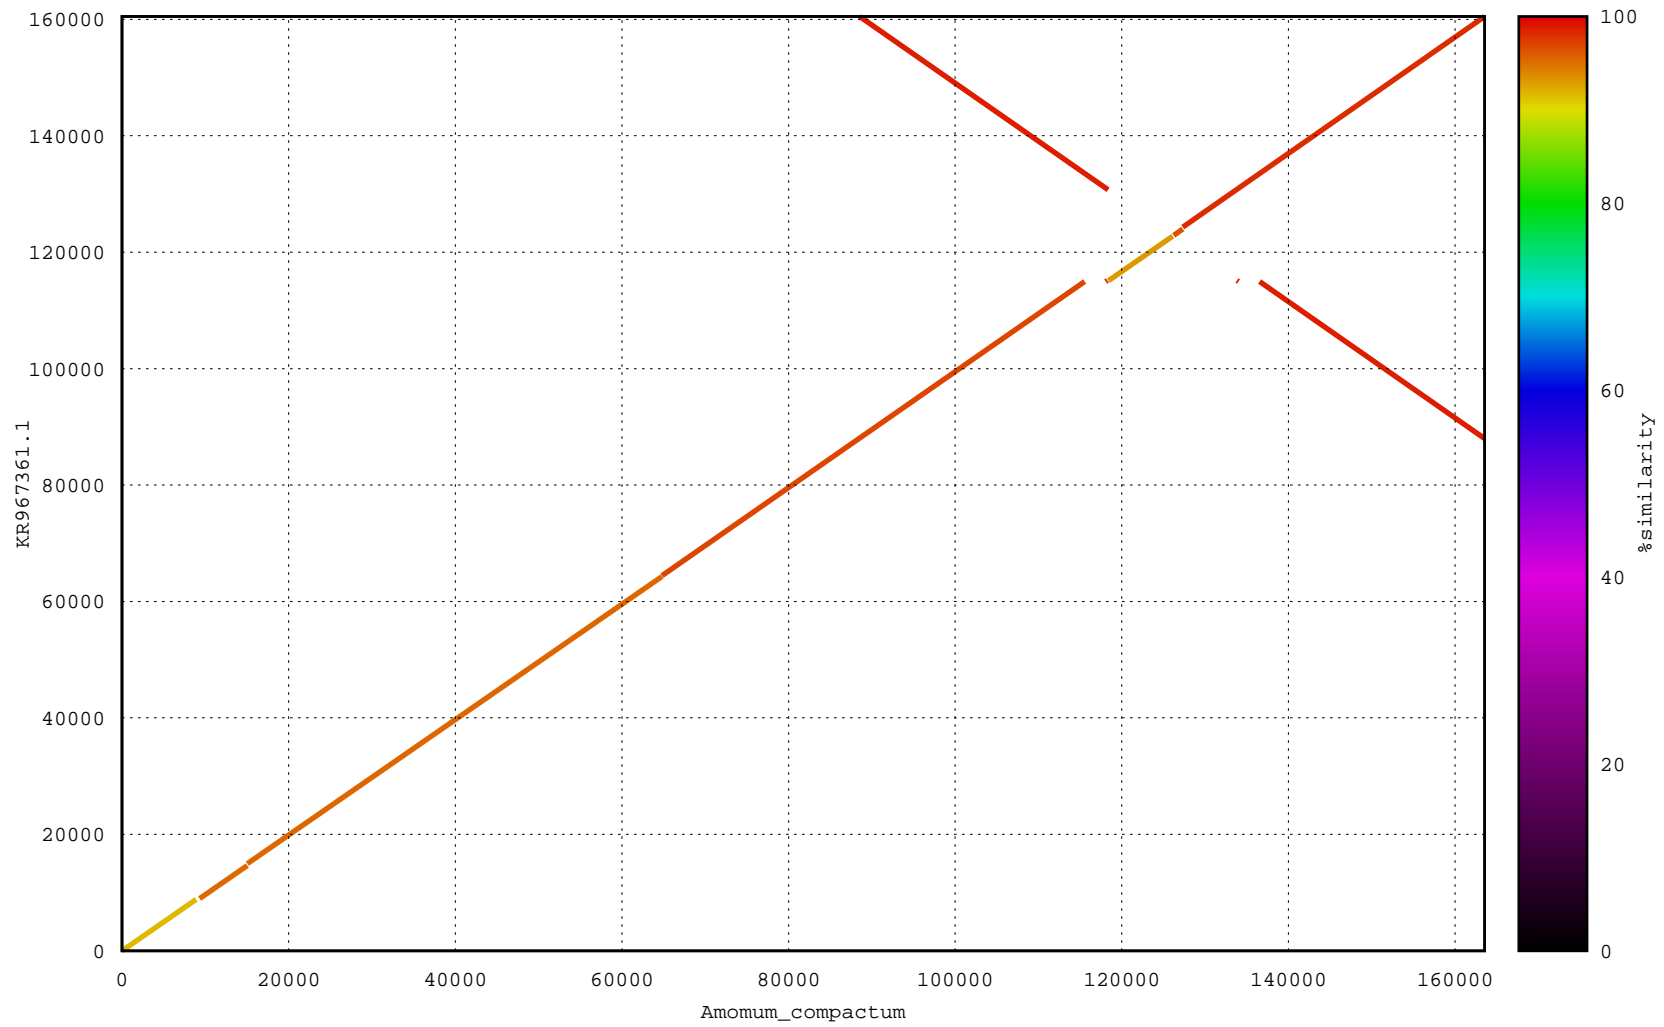

Supplement: 13020_2018_164_MOESM3_ESM.pdf [file 13020_2018_164_MOESM3_ESM.pdf]
