# Supplementary material for: Complete chloroplast genome of the medicinal plant Amomum compactum: gene organization, comparative analysis, and phylogenetic relationships within Zingiberales
Source: Springer Nature journal article supplement (doi:10.1186/s13020-018-0164-2), 2018-02-13

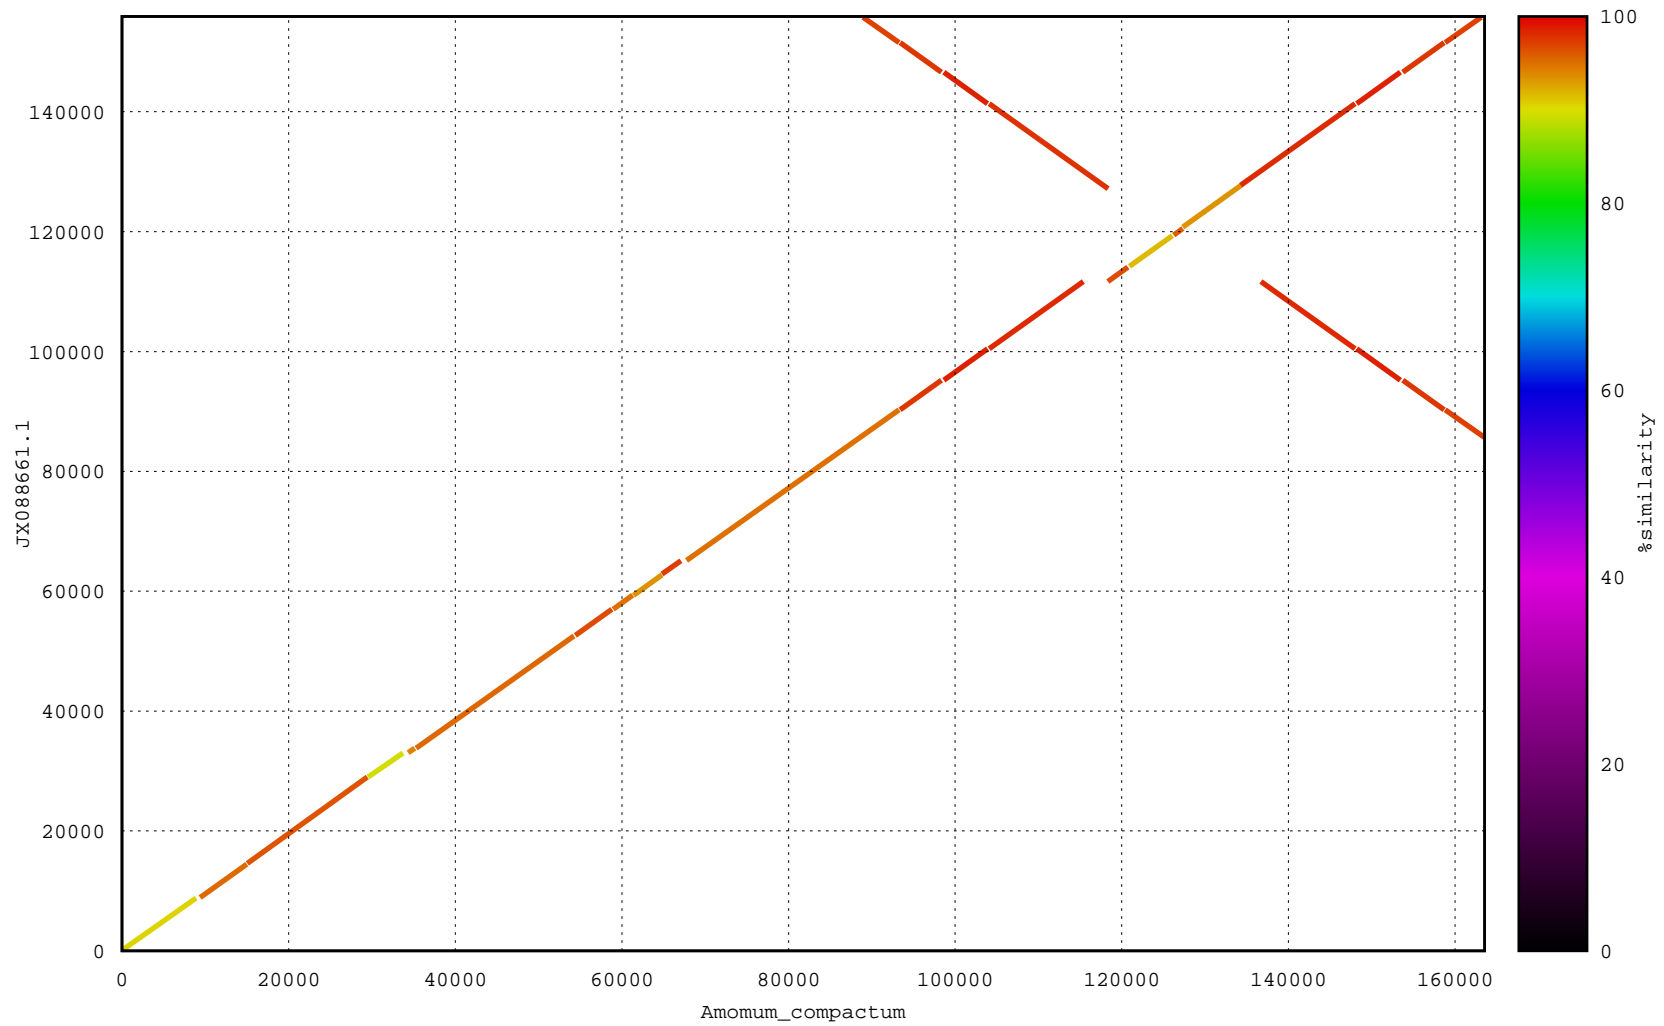

Supplement: MOESM5 [file 15462780]
